# Supplementary material for: Wnt5a-treated midbrain neural stem cells improve dopamine cell replacement therapy in parkinsonian mice
Source: JCI journal article supplement (doi:10.1172/jci32273), 2008-01-02
Supplement: sd1 [file 1]

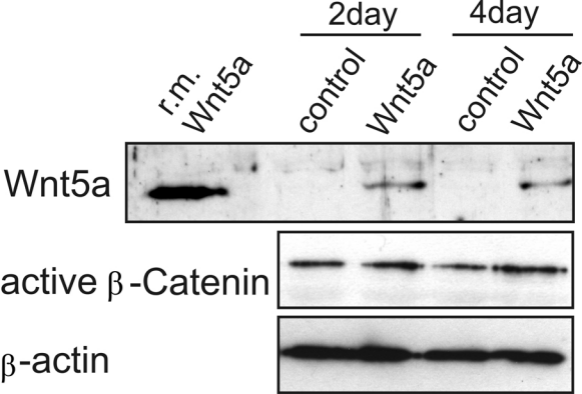

**Supplementary Figure 1: Non-canonical Wnt5a signaling is maintained in VMN.**

Wnt5a was secreted, and stably expressed, from Wnt5a-VMN as assessed by immunoblot using a Wnt5a antibody at 2days and 4days after transfection/differentiation. The effects of Wnt5a on dopaminergic induction were mediated through non-canonical signaling, as no changes in levels of active  $\beta$ -catenin could be detected between control and Wnt5a over-expression VMN.  $\beta$ -actin was used as a control for protein loading.
